# Supplementary material
Source: PubMed Central journal article supplement (PMC4398631)
Supplement: NIHMS663653-supplement-table_1.pdf [file NIHMS663653-supplement-table_1.pdf]

| DMP1 $\beta$ IHC vs clinical stages          |                                                                                    |           |          |            |          |              |         |         |         |       |
|----------------------------------------------|------------------------------------------------------------------------------------|-----------|----------|------------|----------|--------------|---------|---------|---------|-------|
| Stage                                        | I                                                                                  | IIA       | IIB      | IIA or B   | IIIA     | IIIB         | IIIC    | IV      | unknown | total |
| IHC 0-3 (%)                                  | 3 (10.7)                                                                           | 13 (46.4) | 3 (10.7) | 1 (3.6)    | 6 (21.4) | 1 (3.6)      | 0 (0)   | 0 (0)   | 1 (3.6) | 28    |
| IHC 4-6 (%)                                  | 14 (40.0)                                                                          | 4 (11.4)  | 4 (11.4) | 0 (0)      | 6 (17.1) | 3 (8.6)      | 2 (5.7) | 1 (2.9) | 1 (2.9) | 35    |
|                                              | $p = 0.0218, \chi^2 = 5.26$ DMP1 $\beta$ IHC 4-6 intensity associated with stage I |           |          |            |          |              |         |         |         |       |
| DMP1 $\beta/\alpha$ ratio vs clinical stages |                                                                                    |           |          |            |          |              |         |         |         |       |
| Stage                                        | I                                                                                  | IIA       | IIB      | IIA or B   | IIIA     | IIIB         | IIIC    | IV      | unknown | total |
| DMP1 $\beta/\alpha$ high (%)                 | 7 (50)                                                                             | 3 (21.4)  | 3 (21.4) | 0 (0)      | 0 (0)    | 0 (0)        | 1 (7.1) | 0 (0)   | 0 (0)   | 14    |
| DMP1 $\beta/\alpha$ low (%)                  | 8 (25)                                                                             | 12 (37.5) | 3 (9.4)  | 1 (3.1)    | 7 (21.9) | 0 (0)        | 0 (0)   | 1 (3.1) | 0 (0)   | 32    |
|                                              | $p = 0.1189, \chi^2 = 2.432$                                                       |           |          |            |          |              |         |         |         |       |
| DMP1 $\beta$ IHC vs subclass                 |                                                                                    |           |          |            |          |              |         |         |         |       |
| Classification                               | luminal A                                                                          | liminal B | HER2     | triple neg | normal   | unclassified | total   |         |         |       |
| IHC 0-3 (%)                                  | 9 (32.1)                                                                           | 6 (21.4)  | 5 (17.9) | 4 (14.3)   | 1 (3.6)  | 3 (10.7)     | 28      |         |         |       |
| IHC 4-6 (%)                                  | 12 (34.3)                                                                          | 9 (25.7)  | 7 (20.0) | 4 (11.4)   | 0 (0)    | 3 (8.6)      | 35      |         |         |       |
|                                              | $p = 0.7642, \chi^2 = 0.09$                                                        |           |          |            |          |              |         |         |         |       |
| DMP1 $\beta/\alpha$ ratio vs subclass        |                                                                                    |           |          |            |          |              |         |         |         |       |
| Classification                               | luminal A                                                                          | liminal B | HER2     | triple neg | normal   | unclassified | total   |         |         |       |
| DMP1 $\beta/\alpha$ high (%)                 | 7 (50)                                                                             | 3 (21.4)  | 1 (7.1)  | 2 (14.3)   | 0 (0)    | 1 (7.1)      | 14      |         |         |       |
| DMP1 $\beta/\alpha$ low (%)                  | 7 (21.9)                                                                           | 10 (31.3) | 8 (25)   | 5 (15.6)   | 2 (6.3)  | 0 (0)        | 32      |         |         |       |
|                                              | $p = 0.1189, \chi^2 = 2.432$                                                       |           |          |            |          |              |         |         |         |       |

### Supplementary Table 1. Correlation of DMP1 $\beta$ expression with current histological and molecular classifications of human breast cancer.

Currently used prognostic indicators, clinical stage and sub-classification, for breast cancer were correlated to DMP1 $\beta$  protein (IHC) expression and aberrant *DMP1 $\beta/\alpha$*  splicing. High DMP1 $\beta$  protein staining in IHC was found associated with stage I of breast cancer ( $p = 0.0218, \chi^2 = 5.26$ ). Aberrant *DMP1 $\beta/\alpha$*  (high) ratios were found to trend with stage I, but the data were not statistically significant.
